# Supplementary material for: Cloning and molecular characterization of a mitogen-activated protein kinase gene from Poncirus trifoliata whose ectopic expression confers dehydration/drought tolerance in transgenic tobacco
Source: PubMed Central journal article supplement — J Exp Bot. 2011 Jul 21;62(14):5191–206. doi: 10.1093/jxb/err229 (PMC3193021; doi:10.1093/jxb/err229), 2011-07-21
Supplement: supp_err229_00065383-file001.pdf [file supp_err229_00065383-file001.pdf]

## Supplementary Table 1

Information on the proteins used for construction of the phylogenetic tree

| <b>Proteins</b> | <b>Accession number</b> | <b>Plants</b>                                 |
|-----------------|-------------------------|-----------------------------------------------|
| NtSIPK          | AAB58396                | <i>Nicotiana tabacum</i>                      |
| NbSIPK          | BAC53772                | <i>Nicotiana benthamiana</i>                  |
| AtMPK6          | NP_181907               | <i>Arabidopsis thaliana</i>                   |
| OsMPK5          | AAL87689                | <i>Oryza sativa</i>                           |
| NtWIPK          | BAA09600                | <i>Nicotiana tabacum</i>                      |
| AtMPK3          | NP_190150               | <i>Arabidopsis thaliana</i>                   |
| PsMAPK3         | AAF73236                | <i>Pisum sativum</i>                          |
| NtNTF6          | CAA58760                | <i>Nicotiana tabacum</i>                      |
| NbNTF6          | BAG31942                | <i>Nicotiana benthamiana</i>                  |
| AtMPK5          | NP_567378               | <i>Arabidopsis thaliana</i>                   |
| AtMPK4          | NP_192046               | <i>Arabidopsis thaliana</i>                   |
| OsMPK3          | ABH01189                | <i>Oryza sativa Indica Group</i>              |
| ZmMPK7          | ABC02871                | <i>Zea mays</i>                               |
| OsMPK4          | CAB61889                | <i>Oryza sativa</i>                           |
| AtMPK7          | NP_179409               | <i>Arabidopsis thaliana</i>                   |
| AtMPK14         | NP_195363               | <i>Arabidopsis thaliana</i>                   |
| PaMAPK          | AAD32204                | <i>Prunus armeniaca</i>                       |
| NtNTF3          | CAA49592                | <i>Nicotiana tabacum</i>                      |
| PsMPK2          | AAF73257                | <i>Pisum sativum</i>                          |
| AtMPK1          | NP_172492               | <i>Arabidopsis thaliana</i>                   |
| AtMPK2          | NP_564746               | <i>Arabidopsis thaliana</i>                   |
| AtMPK20         | NP_565989               | <i>Arabidopsis thaliana</i>                   |
| OsMPK8          | CAD54742                | <i>Oryza sativa (japonica cultivar-group)</i> |
| AtMPK17         | NP_001030941            | <i>Arabidopsis thaliana</i>                   |
| AtMPK8          | NP_173253               | <i>Arabidopsis thaliana</i>                   |
| OsMPK12         | AAD52659                | <i>Oryza sativa</i>                           |
